# Supplementary material for: Polygenic score prediction of psychopathology dimensions and diagnoses within and between families
Source: Research Square preprint supplement (doi:10.21203/rs.3.rs-8232693/v1), 2025-12-05
Supplement: Supplementary file 1 [file 952c491597812644cbe07ed1.docx]

**Supplementary information**

**Polygenic score prediction of psychopathology dimensions and diagnoses within and between families**

Yujing Lina, Francesca Procopioa, Engin Kesera, Kaito Kawakamia, Thalia C. Eleya, Kaili Rimfelda, b, Margherita Malanchinia, c, Robert Plomina

a Social, Genetic and Developmental Psychiatry Centre, King's College London

b Department of Psychology, Royal Holloway University of London

c School of Biological and Behavioural Sciences, Queen Mary University of London

Table of Contents

[Supplementary Note. Power Analysis 2](#_Toc215068232)

[Table S1. Sample characteristics 3](#_Toc215068233)

[Table S2. Within-family and population genetic effect estimates for dimensional and diagnostic outcomes 5](#_Toc215068234)

[Table S3. Comparisons between the within-family and population estimates 7](#_Toc215068235)

[Table S4. Mixed-effects model results 8](#_Toc215068236)

[Table S5. Sex-stratified within-family and population genetic effect estimates for dimensional and diagnostic outcomes 9](#_Toc215068237)

[Table S6. Sex-stratified mixed-effects model results 12](#_Toc215068238)

[Table S7. Phenotypic sensitivity analyses for sex, birth order, zygosity, and age 14](#_Toc215068239)

[Figure S1. Sex-stratified population estimates 17](#_Toc215068240)

[Figure S2. Sex-stratified within-family estimates 18](#_Toc215068241)

[References 19](#_Toc215068242)

# **Supplementary Note. Power Analysis**

Before carrying out the analyses, we conducted a priori power tests. For dimensional outcomes, a sample of 800 participants provides 81.1% power to detect an effect explaining 1.0% of phenotypic variance 1. Since both the population-level (N = 3000) and within-family (N = 1500 DZ pairs) analyses apply the same regression framework, power will be sufficient for both, exceeding the minimum requirement.

For diagnostic outcomes, power was estimated using Monte Carlo simulations (5000 replications) 2. At the population level, a sample of 3000 individuals provides 84.6% power to detect a log-odds (log-odds) of 0.250 for a 5.0% case prevalence. At the within-family level, we modelled DZ twin concordance as a two-level ordinal outcome (concordant outcome for both affected or unaffected vs. discordant outcomes), regressed on the intra-pair difference in polygenic scores. Therefore, statistical power is determined by the distribution of pairs across the three outcome categories. With 1500 DZ pairs, we had 87.2% power to detect an effect equivalent to a log-odds of 0.150.

Additionally, we calculated the minimum detectable effect size for the difference between population (N = 3000) and within-family (N = 1500) predictions. For dimensions, given a population standardized beta prediction of 0.150, we have 80.0% power to detect a correlation difference of at least 0.088. For diagnoses, we only reached 67.2% power to detect a log-odds difference of 0.200 for a population log-odds of 0.250 with a 5.0% case prevalence.

# **Table S1. Sample characteristics**

|  | **Unrelated Individuals** | | | | | | |
| --- | --- | --- | --- | --- | --- | --- | --- |
| **Trait** | **Age** | **N cases (%Female) /total (%Female)** | **N individual (%Female)** | **Mean(SD)** | **Min** | **Max** | **Skewness** |
| Autism | 26.416 (0.923) | 41 (51.2%) / 3264 (64.2%) | 3055 (65.1%) | 4.325 (4.639) | 0 | 18 | 1.095 |
| Bipolar | 25 (80.0%) / 3276 (64.3%) | 1608 (62.6%) | 11.657 (6.691) | 2.571 | 42.429 | 1.179 |
| ADHD | 45 (53.3%) / 3264 (64.2%) | 3054 (65.1%) | 6.519 (5.936) | 0 | 33 | 1.458 |
| Eating Disorder | 324 (87.0%) / 3033 (64.8%) | 926 (69.7%) | 0.453 (0.215) | 0.056 | 1.087 | 0.431 |
| Anxiety | 755 (75.5%) / 2867 (65.4%) | 3204 (64.9%) | 7.736 (7.292) | 0 | 38 | 1.305 |
| Alcohol Use | - | 2920 (65.1%) | 6.553 (4.704) | 0 | 31 | 1.252 |
| Depression | 1186 (70.1%) / 3266 (64.4%) | 3313 (64.3%) | 6.900 (6.315) | 0 | 26 | 1.003 |
| PTSD | 136 (85.3%) / 3276 (64.3%) | 3096 (65.0%) | 5.474 (5.648) | 0 | 24 | 1.202 |
|  | **Full DZ Twin Pairs** | | | | | | |
| **Trait** | **Age** | **N cases (%Female) /total (%Female)** | **N pair (%Female)** | **Mean(SD)** | **Min** | **Max** | **Skewness** |
| Autism | 26.342 (0.912) | 20 (45.0%) / 1587 (62.1%) | 1482 (62.8%) | 4.292 (4.563) | 0 | 18 | 1.113 |
| Bipolar | 11 (72.7%) / 1600 (62.2%) | 789 (61.5%) | 11.887 (6.799) | 2.571 | 41.400 | 1.069 |
| ADHD | 23 (34.8%) / 1587 (62.1%) | 1483 (62.8%) | 6.688 (6.142) | 0 | 33 | 1.452 |
| Eating Disorder | 165 (87.3%) / 1473 (62.6%) | 449 (67.9%) | 0.451 (0.226) | 0.056 | 1.087 | 0.527 |
| Anxiety | 382 (75.7%) / 1382 (63.4%) | 1560 (62.9%) | 7.901 (7.391) | 0 | 37 | 1.305 |
| Alcohol Use | - | 1422 (63.2%) | 6.650 (4.765) | 0 | 29 | 1.146 |
| Depression | 597 (70.7%) / 1587 (62.4%) | 1616 (62.1%) | 6.962 (6.302) | 0 | 26 | 1.011 |
| PTSD | 77 (85.7%) / 1600 (62.2%) | 1503 (62.8%) | 5.509 (5.658) | 0 | 24 | 1.179 |
|  | **Full Same-Sex DZ Pairs** | | | | | | |
| **Trait** | **Age** | **N cases (%Female) /total (%Female)** | **N pair (%Female)** | **Mean(SD)** | **Min** | **Max** | **Skewness** |
| Autism | 26.348 (0.929) | 6 (50.0%) / 836 (65.8%) | 780 (66.4%) | 4.116 (4.493) | 0 | 18 | 1.150 |
| Bipolar | 7 (57.1%) / 844 (66.0%) | 400 (63.5%) | 11.895 (6.821) | 2.571 | 41.400 | 1.022 |
| ADHD | 11 (36.4%) / 836 (65.8%) | 781 (66.3%) | 6.440 (5.890) | 0 | 30 | 1.388 |
| Eating Disorder | 85 (85.9%) / 781 (66.3%) | 223 (74.4%) | 0.465 (0.235) | 0.056 | 1.083 | 0.550 |
| Anxiety | 196 (79.6%) / 719 (67.3%) | 823 (66.6%) | 7.904 (7.325) | 0 | 37 | 1.267 |
| Alcohol Use | - | 747 (66.5%) | 6.666 (4.732) | 0 | 29 | 1.144 |
| Depression | 321 (73.8%) / 836 (65.9%) | 853 (65.8%) | 6.961 (6.261) | 0 | 26 | 0.995 |
| PTSD | 42 (81.0%) / 844 (66.0%) | 794 (66.5%) | 5.414 (5.586) | 0 | 24 | 1.188 |
|  | **Full Opposite-Sex DZ Pairs** | | | | | | |
| **Trait** | **Age** | **N cases (%Female) /total (%Female)** | **N pair (%Female)** | **Mean(SD)** | **Min** | **Max** | **Skewness** |
| Autism | 26.335 (0.893) | 14 (42.9%) / 751 (57.9%) | 702 (58.8%) | 4.489 (4.634) | 0 | 18 | 1.072 |
| Bipolar | 4 (100.0%) / 756 (57.9%) | 389 (59.4%) | 11.880 (6.784) | 2.571 | 40.500 | 1.118 |
| ADHD | 12 (33.3%) / 751 (57.9%) | 702 (58.8%) | 6.964 (6.404) | 0 | 33 | 1.488 |
| Eating Disorder | 80 (88.8%) / 692 (58.4%) | 226 (61.5%) | 0.437 (0.216) | 0.056 | 1.087 | 0.464 |
| Anxiety | 186 (71.5%) / 663 (59.1%) | 737 (58.9%) | 7.898 (7.468) | 0 | 36 | 1.345 |
| Alcohol Use | - | 675 (59.4%) | 6.632 (4.806) | 0 | 28 | 1.148 |
| Depression | 276 (67.0%) / 751 (58.6%) | 763 (58.1%) | 6.963 (6.353) | 0 | 26 | 1.029 |
| PTSD | 35 (91.4%) / 756 (57.9%) | 709 (58.7%) | 5.616 (5.740) | 0 | 24 | 1.167 |
|  |  |  |  |  |  |  |  |
|  | **Discordant DZ Pairs** | | | | | | |
| **Trait** | **Age** | **N discordant DZ pairs (%Female) /total (%Female)** | | **Mean(SD)** | **Min** | **Max** | **Skewness** |
| Autism | 26.382 (0.890) | 54 (56.5%) / 1665 (62.5%) | | 8.673 (6.733) | 0.000 | 18.000 | 0.153 |
| Bipolar | 28 (76.8%) / 1663 (62.7%) | | 21.076 (10.562) | 5.400 | 45.000 | 0.498 |
| ADHD | 49 (60.2%) / 1665 (62.5%) | | 11.364 (8.782) | 0.000 | 33.000 | 0.736 |
| Eating Disorder | 238 (70.2%) / 1500 (62.6%) | | 0.564 (0.211) | 0.056 | 1.083 | -0.039 |
| Anxiety | 453 (65.8%) / 1306 (63.3%) | | 10.129 (8.044) | 0.000 | 40.000 | 0.925 |
| Alcohol Use | - | | 7.854 (6.375) | 0.000 | 26.000 | 0.775 |
| Depression | 123 (75.2%) / 1663 (62.7%) | | 8.781 (6.806) | 0.000 | 24.000 | 0.519 |
| PTSD | 54 (56.5%) / 1665 (62.5%) | | 8.673 (6.733) | 0.000 | 18.000 | 0.153 |

*Note*. N individual denotes the number of individuals used in the calculation of the inferential statistics. Unrelated individuals in the sample were selected by randomly including one twin per pair from MZ and DZ twins. The percentage of diagnosed individuals was calculated only using participants who answered items about either clinical or self-reported diagnoses. Continuous current psychopathology traits and dichotomous diagnostic history are measured using different questions, therefore we have slightly different sample size for each trait on a continuous versus a binary scale.

Regarding the relatively low case prevalence of certain psychopathology conditions, this is expected because TEDS is a population-based sample, and the observed case prevalence reflects the general population rates rather than a clinical cohort. For alcohol use, only continuous trait measures were available, and therefore no diagnostic case numbers are reported.

Regarding the minimum and maximum of the composite scores, all trait composites were derived using a prorated procedure, whereby participants were included only if they had answered at least half of the relevant items. Consequently, for bipolar symptoms, which combine several MDQ-derived items with different numeric ranges (e.g., symptom counts, impairment, and diagnosis indicators), the minimum and maximum can be non-integer values. In contrast, for eating disorder symptoms, which were based on DSM-5–aligned diagnostic items converted into a continuous measure by averaging binary indicators of restrictive, binge-eating, and compensatory behaviours, the range is 0–1, reflecting the proportion of behaviors endorsed rather than a raw symptom count.

All values are rounded to three decimal places. The percentage of females is expressed as a percentage for easier interpretation.

# **Table S2. Within-family and population genetic effect estimates for dimensional and diagnostic outcomes**

|  |  | **Within-family effects for dimensions** | | |
| --- | --- | --- | --- | --- |
| **Traits** | **Standardized beta estimate (SE)** | **Model variance explained** 1 | **Variance in the predictor** 2 | **FDR-adjusted p-value** |
| Autism | 0.049 (0.029) | 1.3% | 0.3% | 0.247 |
| Bipolar | 0.007 (0.050) | 5.0% | 0.5% | 0.903 |
| ADHD | 0.056 (0.031) | 1.3% | 0.4% | 0.208 |
| Eating Behaviors | 0.123 (0.101) | 8.2% | 1.1% | 0.371 |
| Anxiety | 0.032 (0.030) | 0.8% | -0.2% | 0.373 |
| Alcohol Use | 0.046 (0.034) | 1.0% | 0.5% | 0.322 |
| Depression | 0.067 (0.030) | 1.4% | 0.3% | 0.102 |
| PTSD | 0.099 (0.028) | 2.2% | 1.0% | 0.023 |
|  |  | **Within-family effects for diagnoses** | | |
|  | **Log-odds (SE)** |  |  |  |
| Autism Diagnoses | 0.500 (0.185) | 10.6% | 2.2% | 0.060 |
| Bipolar Diagnoses | 0.324 (0.260) | 6.1% | 1.6% | 0.371 |
| ADHD Diagnoses | -0.107 (0.146) | 5.5% | 1.3% | 0.654 |
| Eating Disorder Diagnoses | 0.090 (0.098) | 4.0% | 0.3% | 0.384 |
| Anxiety Diagnoses | 0.179 (0.079) | 2.2% | 0.2% | 0.060 |
| Depression Diagnoses | 0.159 (0.060) | 1.3% | 0.4% | 0.060 |
| PTSD Diagnoses | 0.199 (0.114) | 4.9% | 0.6% | 0.208 |
|  |  | **Population effects for dimensions** | | |
| **Traits** | **Standardized beta estimate (SE)** |  |  |  |
| Autism | 0.039 (0.018) | 1.0% | 0.2% | 0.038 |
| Bipolar | 0.039 (0.025) | 0.9% | 0.1% | 0.150 |
| ADHD | 0.067 (0.018) | 1.3% | 0.4% | 0.000 |
| Eating Behaviors | 0.092 (0.033) | 1.6% | 0.9% | 0.006 |
| Anxiety | 0.149 (0.017) | 2.7% | 2.3% | 0.000 |
| Alcohol Use | 0.131 (0.018) | 3.3% | 1.7% | 0.000 |
| Depression | 0.152 (0.018) | 2.7% | 2.2% | 0.000 |
| PTSD | 0.159 (0.017) | 3.0% | 2.4% | 0.000 |
|  |  | **Population effects for diagnoses** | | |
|  | **Log-odds (SE)** |  |  |  |
| Autism Diagnoses | 0.235 (0.197) | 4.5% | 0.5% | 0.150 |
| Bipolar Diagnoses | -0.016 (0.161) | 4.9% | 0.1% | 0.940 |
| ADHD Diagnoses | 0.117 (0.173) | 5.1% | 0.1% | 0.475 |
| Eating Disorder Diagnoses | 0.202 (0.064) | 5.7% | 0.6% | 0.001 |
| Anxiety Diagnoses | 0.300 (0.045) | 3.3% | 1.5% | 0.000 |
| Depression Diagnoses | 0.267 (0.039) | 2.0% | 1.2% | 0.000 |
| PTSD Diagnoses | 0.548 (0.101) | 7.0% | 3.3% | 0.000 |

*Note*. The population and WF estimates are the same as in Figure 1 in the main text. All estimates are standardized as beta coefficients for dimensional outcomes and log-odds coefficients for diagnostic outcomes. The 95% confidence intervals were calculated using the percentile bootstrap method with 10,000 iterations; asymmetric intervals may occur due to non-normal bootstrap distributions. Variance explained represents R-squared for linear regression (dimensional outcomes) or McFadden's pseudo R-squared for logistic regression (diagnostic outcomes). P-values are adjusted for multiple testing using the False Discovery Rate (FDR) method.

1 Model variance explained represents the overall effects from the PGS predictor and the covariates (age, sex, genotyping chips, and the first ten principal components).

2 Predictor variance explained represent the effects from the PGS predictor only.

# **Table S3. Comparisons between the within-family and population estimates**

|  |  | **Differences between within-family and population estimates** | | |
| --- | --- | --- | --- | --- |
| **Traits** | **Mean differences** | **Lower 95% CI** | **Upper 95% CI** | **FDR-adjusted p-value** |
| Autism | -0.010 | -0.079 | 0.057 | 0.794 |
| Bipolar | 0.032 | -0.077 | 0.143 | 0.690 |
| ADHD | 0.011 | -0.058 | 0.082 | 0.794 |
| Eating Behaviors | -0.028 | -0.236 | 0.185 | 0.794 |
| Anxiety | 0.117 | 0.050 | 0.185 | 0.007 |
| Alcohol Use | 0.085 | 0.008 | 0.160 | 0.090 |
| Depression | 0.085 | 0.017 | 0.152 | 0.088 |
| PTSD | 0.061 | -0.004 | 0.125 | 0.170 |
| Autism Diagnoses | -0.280 | -0.807 | 0.243 | 0.430 |
| Bipolar Diagnoses | -0.362 | -0.983 | 0.207 | 0.389 |
| ADHD Diagnoses | 0.221 | -0.220 | 0.663 | 0.430 |
| Eating Disorder Diagnoses | 0.113 | -0.117 | 0.345 | 0.430 |
| Anxiety Diagnoses | 0.121 | -0.054 | 0.297 | 0.322 |
| Depression Diagnoses | 0.109 | -0.032 | 0.248 | 0.288 |
| PTSD Diagnoses | 0.357 | 0.059 | 0.655 | 0.088 |
|  | **Ratio between within-family and population estimates** | | | |
| **Traits** | **Ratio** | **Lower 95% CI** | **Upper 95% CI** |  |
| Autism | 1.265 | -0.564 | 7.737 |  |
| Bipolar | 0.170 | -7.362 | 8.764 |  |
| ADHD | 0.833 | -0.073 | 2.348 |  |
| Eating Behaviors | 1.338 | -1.007 | 6.180 |  |
| Anxiety | 0.217 | -0.179 | 0.636 |  |
| Alcohol Use | 0.353 | -0.163 | 0.936 |  |
| Depression | 0.440 | 0.050 | 0.876 |  |
| PTSD | 0.620 | 0.267 | 1.028 |  |
| Autism Diagnoses | 2.131 | -17.459 | 22.190 |  |
| Bipolar Diagnoses | -20.813 | -38.289 | 35.863 |  |
| ADHD Diagnoses | -0.919 | -11.871 | 9.970 |  |
| Eating Disorder Diagnoses | 0.443 | -0.559 | 1.953 |  |
| Anxiety Diagnoses | 0.595 | 0.087 | 1.205 |  |
| Depression Diagnoses | 0.597 | 0.153 | 1.139 |  |
| PTSD Diagnoses | 0.362 | -0.040 | 0.868 |  |

*Note*. Differences between within-family and population estimates and their ratios, along with 95% confidence intervals, are calculated from 10,000 bootstrap iterations. Potential asymmetric intervals may occur due to non-normal bootstrap distributions. P-values are adjusted for multiple testing using the False Discovery Rate (FDR) method. Please note that mean differences are calculated as population estimates minus within-family estimates. Dimensional outcomes are expressed in standardized beta units, whereas dichotomous outcomes are expressed in log-odds units. Figure 2 presents a subset of the ratios between within-family and population estimates, selected based on the statistical significance of the population estimates from Table S2 (i.e., where the denominator of the ratio is significantly different from zero).

# **Table S4. Mixed-effects model results**

| **Dimensions** | **Deviation from pair mean**  **(within-family estimate)** | | | **Pair mean**  **(population estimate)** | | | **Variance in outcome predicted by the model** |
| --- | --- | --- | --- | --- | --- | --- | --- |
| **Est** | **SE** | **FDR-adjusted p value** | **Est** | **SE** | **FDR-adjusted p value** |
| autism | 0.070 | 0.033 | 0.071 | 0.051 | 0.022 | 0.033 | 1.0% |
| bipolar | 0.041 | 0.048 | 0.513 | 0.065 | 0.030 | 0.048 | 1.1% |
| ADHD | 0.061 | 0.034 | 0.115 | 0.098 | 0.022 | 0.000 | 1.3% |
| eating behaviors | 0.046 | 0.067 | 0.588 | 0.047 | 0.040 | 0.340 | 1.3% |
| anxiety | 0.075 | 0.033 | 0.061 | 0.167 | 0.021 | 0.000 | 2.7% |
| alcohol | 0.068 | 0.034 | 0.078 | 0.152 | 0.022 | 0.000 | 3.4% |
| depression | 0.104 | 0.032 | 0.004 | 0.159 | 0.021 | 0.000 | 2.7% |
| PTSD | 0.128 | 0.032 | 0.001 | 0.157 | 0.022 | 0.000 | 2.6% |
| **Diagnoses** | **Log-odds** | **SE** | **FDR-adjusted p value** | **Log-odds** | **SE** | **FDR-adjusted p values** |  |
| autism | 2.599 | 1.233 | 0.071 | 0.346 | 2.896 | 0.938 | 3.6% |
| bipolar | 4.150 | 2.596 | 0.152 | 0.529 | 6.821 | 0.938 | 5.0% |
| ADHD | -0.262 | 1.439 | 0.855 | 0.612 | 2.461 | 0.928 | 0.9% |
| eating disorder | 0.129 | 0.268 | 0.667 | 0.162 | 0.729 | 0.928 | 4.0% |
| anxiety | 0.316 | 0.093 | 0.004 | 0.327 | 0.056 | 0.000 | 6.8% |
| depression | 0.262 | 0.080 | 0.004 | 0.328 | 0.048 | 0.000 | 4.5% |
| PTSD | 0.332 | 0.177 | 0.099 | 0.575 | 0.103 | 0.000 | 19.9% |

*Note*. The estimates are the same as in Figure 3 in the main text. Within-family genetic effects were estimated using each DZ twin's polygenic score deviation from the full DZ twin pair mean. Twin pair mean genetic effects (proxy for population effects) were captured using the twin pair mean polygenic score. All p-values were adjusted for multiple testing using the False Discovery Rate (FDR) method. R-squared represents the variance explained by both within-family and residual genetic effects combined.

# **Table S5. Sex-stratified within-family and population genetic effect estimates for dimensional and diagnostic outcomes**

|  |  | **Same-sex female within-family effects for dimensions** | | |
| --- | --- | --- | --- | --- |
| **Traits** | **Standardized beta estimate (SE)** | **Model variance explained** | **Variance in the predictor** | **FDR-adjusted p-value** |
| Autism | 0.029 (0.047) | 2.6% | 0.1% | 0.662 |
| Bipolar | 0.048 (0.099) | 19.3% | 4.8% | 0.677 |
| ADHD | 0.062 (0.051) | 1.8% | 0.3% | 0.346 |
| Eating Behaviors | 0.224 (0.154) | 28.8% | 4.8% | 0.346 |
| Anxiety | 0.057 (0.048) | 2.0% | 0.1% | 0.354 |
| Alcohol Use | 0.071 (0.050) | 2.9% | 1.1% | 0.346 |
| Depression | 0.108 (0.046) | 3.5% | 1.2% | 0.159 |
| PTSD | 0.110 (0.045) | 3.1% | 1.8% | 0.159 |
|  |  | **Same-sex male within-family effects for dimensions** | | |
| Autism | 0.117 (0.072) | 7.9% | 3.0% | 0.369 |
| Bipolar | 0.063 (0.177) | 14.9% | -3.5% | 0.860 |
| ADHD | 0.139 (0.079) | 10.3% | 1.6% | 0.369 |
| Eating Behaviors | 0.837 (66.472) | 100.0% | 33.5% | NA (NA) |
| Anxiety | 0.085 (0.080) | 7.8% | 0.0% | 0.477 |
| Alcohol Use | 0.099 (0.087) | 11.5% | 3.8% | 0.406 |
| Depression | 0.066 (0.074) | 5.0% | -0.3% | 0.563 |
| PTSD | 0.139 (0.072) | 9.6% | 4.3% | 0.369 |
|  |  | **Opposite-sex twin within-family effects for dimensions** | | |
| Autism | 0.035 (0.046) | 3.0% | 0.6% | 0.842 |
| Bipolar | -0.064 (0.070) | 9.0% | 1.7% | 0.842 |
| ADHD | 0.009 (0.048) | 2.9% | 0.2% | 0.966 |
| Eating Behaviors | -0.006 (0.210) | 14.5% | 5.8% | 0.977 |
| Anxiety | 0.011 (0.046) | 2.3% | -0.1% | 0.966 |
| Alcohol Use | 0.015 (0.053) | 1.1% | 0.6% | 0.966 |
| Depression | 0.045 (0.047) | 1.8% | 0.3% | 0.842 |
| PTSD | 0.072 (0.044) | 2.7% | 0.2% | 0.842 |
|  |  | **Same-sex female within-family effects for diagnoses** | | |
|  | **Log-odds (SE)** |  |  |  |
| Autism Diagnoses | 0.170 (227.538) | 31.0% | 10.6% | 0.792 |
| Bipolar Diagnoses | 0.497 (10.87) | 7.6% | 4.2% | 0.346 |
| ADHD Diagnoses | 0.082 (1.420264e+11) | 14.1% | -0.5% | 0.812 |
| Eating Disorder Diagnoses | -0.186 (0.155) | 3.0% | 0.7% | 0.346 |
| Anxiety Diagnoses | 0.247 (0.130) | 1.9% | 0.6% | 0.159 |
| Depression Diagnoses | 0.344 (0.102) | 2.6% | 1.4% | 0.013 |
| PTSD Diagnoses | 0.174 (0.139) | 3.1% | 0.5% | 0.352 |
|  |  | **Same-sex male within-family effects for diagnoses** | | |
| Autism Diagnoses | 1.375 (6.613440e+13) | 41.5% | 11.5% | 0.163 |
| Bipolar Diagnoses | 0.727 (13.939) | 939.7% | 784.1% | 0.406 |
| ADHD Diagnoses | NA (NA) | NA (NA) | NA (NA) | NA (NA) |
| Eating Disorder Diagnoses | 0.003 (0.394) | 10.0% | 1.1% | 0.993 |
| Anxiety Diagnoses | 0.344 (0.277) | 6.1% | 1.6% | 0.369 |
| Depression Diagnoses | -0.007 (0.162) | 2.6% | 0.0% | 0.993 |
| PTSD Diagnoses | 0.500 (4.741875e+13) | 28.1% | 13.8% | 0.406 |
|  |  | **Opposite-sex twin within-family effects for diagnoses** | | |
| Autism Diagnoses | NA (NA) | NA (NA) | NA (NA) | NA (NA) |
| Bipolar Diagnoses | NA (NA) | NA (NA) | NA (NA) | NA (NA) |
| ADHD Diagnoses | -0.259 (2.468272e+12) | 12.0% | 2.0% | 0.842 |
| Eating Disorder Diagnoses | 0.420 (0.151) | 11.1% | 2.1% | 0.048 |
| Anxiety Diagnoses | 0.082 (0.119) | 3.3% | -0.5% | 0.842 |
| Depression Diagnoses | 0.073 (0.097) | 2.0% | 0.2% | 0.842 |
| PTSD Diagnoses | 0.200 (0.256) | 13.9% | 2.1% | 0.842 |
|  |  | **Female population effects for dimensions** | | |
|  | **Standardized beta estimate (SE)** |  |  |  |
| Autism | 0.043 (0.023) | 1.2% | 0.2% | 0.066 |
| Bipolar | 0.024 (0.032) | 1.7% | 0.1% | 0.552 |
| ADHD | 0.087 (0.021) | 1.7% | 0.8% | 0.000 |
| Eating Behaviors | 0.096 (0.039) | 1.9% | 1.0% | 0.018 |
| Anxiety | 0.165 (0.021) | 3.4% | 2.7% | 0.000 |
| Alcohol Use | 0.118 (0.024) | 3.0% | 1.4% | 0.000 |
| Depression | 0.178 (0.022) | 3.6% | 3.1% | 0.000 |
| PTSD | 0.168 (0.022) | 3.3% | 2.7% | 0.000 |
|  |  | **Male population effects for dimensions** | | |
| Autism | 0.029 (0.032) | 1.1% | 0.1% | 0.454 |
| Bipolar | 0.061 (0.039) | 1.1% | 0.4% | 0.276 |
| ADHD | 0.027 (0.031) | 2.0% | 0.1% | 0.470 |
| Eating Behaviors | 0.082 (0.060) | 2.7% | 0.7% | 0.276 |
| Anxiety | 0.118 (0.029) | 2.1% | 1.4% | 0.000 |
| Alcohol Use | 0.142 (0.029) | 5.1% | 2.2% | 0.000 |
| Depression | 0.095 (0.032) | 2.2% | 0.8% | 0.005 |
| PTSD | 0.139 (0.030) | 3.5% | 1.8% | 0.000 |
|  |  | **Female population effects for diagnoses** | | |
|  | **Log-odds (SE)** |  |  |  |
| Autism Diagnoses | 0.125 (0.287) | 7.1% | 0.1% | 0.615 |
| Bipolar Diagnoses | -0.134 (0.192) | 5.2% | 0.2% | 0.615 |
| ADHD Diagnoses | -0.054 (0.260) | 3.8% | 0.0% | 0.798 |
| Eating Disorder Diagnoses | 0.220 (0.069) | 1.2% | 0.7% | 0.001 |
| Anxiety Diagnoses | 0.356 (0.053) | 2.7% | 2.1% | 0.000 |
| Depression Diagnoses | 0.294 (0.048) | 2.0% | 1.4% | 0.000 |
| PTSD Diagnoses | 0.626 (0.099) | 5.7% | 4.6% | 0.000 |
|  |  | **Male population effects for diagnoses** | | |
| Autism Diagnoses | 0.380 (0.304) | 4.7% | 1.4% | 0.200 |
| Bipolar Diagnoses | 0.384 (8.238639e+12) | 47.9% | 4.9% | 0.454 |
| ADHD Diagnoses | 0.318 (0.247) | 9.9% | 0.9% | 0.276 |
| Eating Disorder Diagnoses | 0.108 (0.189) | 5.5% | 0.1% | 0.557 |
| Anxiety Diagnoses | 0.149 (0.084) | 2.7% | 0.3% | 0.200 |
| Depression Diagnoses | 0.232 (0.070) | 1.8% | 0.8% | 0.002 |
| PTSD Diagnoses | 0.139 (0.291) | 7.7% | 0.2% | 0.604 |

*Note*. Sex-stratified population and WF estimates from the regression approach. Due to small sample sizes and particularly low case prevalence for some psychopathology diagnoses within the subgroups, model fitting may be challenging, resulting in null results or unstable estimates (e.g., extremely large coefficients or variance explained values approaching or exceeding 100%). All estimates are standardized as beta coefficients for dimensional outcomes and log-odds coefficients for diagnostic outcomes. The 95% confidence intervals were calculated using the percentile bootstrap method with 10,000 iterations; asymmetric intervals may occur due to non-normal bootstrap distributions. Variance explained represents R-squared for linear regression (dimensional outcomes) or McFadden's pseudo R-squared for logistic regression (diagnostic outcomes). P-values are adjusted for multiple testing using the False Discovery Rate (FDR) method. Given the reduced statistical power in the sex-stratified analyses, these results should be interpreted with caution until replicated in larger samples.

# **Table S6. Sex-stratified mixed-effects model results**

| **Females** | | | | | | | |
| --- | --- | --- | --- | --- | --- | --- | --- |
| **Continuous traits** | **Deviation from pair mean** | | | **Pair mean** | | | **Fixed effect R^2** |
| **Est** | **SE** | **FDR-adjusted p** | **Est** | **SE** | **FDR-adjusted p** |
| autism | 0.042 | 0.042 | 0.440 | 0.037 | 0.028 | 0.231 | 1.1% |
| bipolar | 0.036 | 0.063 | 0.633 | 0.064 | 0.039 | 0.152 | 2.0% |
| ADHD | 0.075 | 0.044 | 0.131 | 0.111 | 0.026 | 0.000 | 1.7% |
| eating behaviors | 0.059 | 0.080 | 0.547 | 0.060 | 0.050 | 0.282 | 2.3% |
| anxiety | 0.096 | 0.042 | 0.047 | 0.203 | 0.026 | 0.000 | 3.8% |
| alcohol | 0.090 | 0.043 | 0.069 | 0.152 | 0.027 | 0.000 | 3.3% |
| depression | 0.137 | 0.042 | 0.004 | 0.163 | 0.026 | 0.000 | 3.1% |
| PTSD | 0.139 | 0.041 | 0.004 | 0.174 | 0.027 | 0.000 | 3.3% |
| **Diagnoses** | **Deviation from pair mean** | | | **Pair mean** | | | **Fixed effect R^2** |
| **Log-odds** | **SE** | **FDR-adjusted p** | **Log-odds** | **SE** | **FDR-adjusted p** |
| autism | -0.107 | 0.480 | 0.823 | 0.409 | 0.288 | 0.216 | 14.3% |
| bipolar | 0.462 | 0.512 | 0.472 | 0.302 | 0.306 | 0.363 | 14.8% |
| ADHD | 1.034 | 2.395 | 0.705 | 0.754 | 3.501 | 0.829 | 1.2% |
| eating disorder | -0.526 | 0.001 | 0.000 | 0.220 | 0.001 | 0.000 | 0.1% |
| anxiety | 0.339 | 0.113 | 0.007 | 0.358 | 0.067 | 0.000 | 4.4% |
| depression | 0.403 | 0.103 | 0.001 | 0.320 | 0.058 | 0.000 | 3.8% |
| PTSD | 0.354 | 0.191 | 0.105 | 0.638 | 0.112 | 0.000 | 11.7% |
| **Males** | | | | | | | |
| **Continuous traits** | **Deviation from pair mean** | | | **Pair mean** | | | **Fixed effect R^2** |
| **Est** | **SE** | **FDR-adjusted p** | **Est** | **SE** | **FDR-adjusted p** |
| autism | 0.117 | 0.056 | 0.253 | 0.078 | 0.035 | 0.048 | 2.2% |
| bipolar | 0.058 | 0.082 | 0.720 | 0.061 | 0.047 | 0.289 | 1.7% |
| ADHD | 0.026 | 0.061 | 0.924 | 0.077 | 0.035 | 0.049 | 1.7% |
| eating behaviors | 0.037 | 0.124 | 0.924 | 0.016 | 0.069 | 0.864 | 1.2% |
| anxiety | 0.045 | 0.057 | 0.699 | 0.107 | 0.034 | 0.004 | 2.1% |
| alcohol | 0.052 | 0.057 | 0.699 | 0.161 | 0.035 | 0.000 | 4.6% |
| depression | 0.061 | 0.055 | 0.689 | 0.154 | 0.034 | 0.000 | 2.8% |
| PTSD | 0.116 | 0.057 | 0.253 | 0.128 | 0.035 | 0.001 | 2.2% |
| **Diagnoses** | **Deviation from pair mean** | | | **Pair mean** | | | **Fixed effect R^2** |
| **Log-odds** | **SE** | **FDR-adjusted p** | **Log-odds** | **SE** | **FDR-adjusted p** |
| autism | 4.614 | 3.050 | 0.571 | 0.500 | 4.620 | 0.914 | 3.1% |
| bipolar | 0.009 | 0.984 | 0.993 | 0.451 | 0.559 | 0.544 | 44.3% |
| ADHD | -0.027 | 0.426 | 0.993 | 0.709 | 0.235 | 0.006 | 21.6% |
| eating disorder | 0.314 | 0.328 | 0.699 | -0.044 | 0.177 | 0.864 | 9.5% |
| anxiety | 0.237 | 0.168 | 0.571 | 0.252 | 0.099 | 0.021 | 3.4% |
| depression | 0.026 | 0.134 | 0.949 | 0.333 | 0.084 | 0.000 | 3.4% |
| PTSD | 0.141 | 0.483 | 0.924 | 0.224 | 0.280 | 0.544 | 13.6% |

*Note*. Sex-stratified mixed-effects model results. Within-family genetic effects were estimated using each DZ twin's polygenic score deviation from the full DZ twin pair mean. Twin pair mean genetic effects (proxy for population effects) were captured using the twin pair mean polygenic score. All p-values were adjusted for multiple testing using the False Discovery Rate (FDR) method. R-squared represents the variance explained by both within-family and residual genetic effects combined.

# **Table S7. Phenotypic sensitivity analyses for sex, birth order, zygosity, and age**

|  | **Sex Effects (Unrelated)** | | |
| --- | --- | --- | --- |
| **Trait** | **t/** **χ2 statistic** | **Effect size** | **Adjusted p-value** |
| Autism | 0.206 | 0.008 | 0.876 |
| Bipolar | 0.156 | -0.008 | 0.876 |
| ADHD | -0.337 | -0.013 | 0.849 |
| Eating Behaviors | 10.655 | 0.727 | 0.000 |
| Anxiety | 10.773 | 0.381 | 0.000 |
| Alcohol Use | -6.746 | -0.27 | 0.000 |
| Depression | 8.609 | 0.299 | 0.000 |
| PTSD | 7.343 | 0.261 | 0.000 |
| Autism Diagnoses | 2.520 | 0.028 | 0.168 |
| Bipolar Diagnoses | 2.047 | 0.025 | 0.209 |
| ADHD Diagnoses | 1.908 | 0.024 | 0.209 |
| Eating Disorder Diagnoses | 77.430 | 0.160 | 0.000 |
| Anxiety Diagnoses | 45.574 | 0.126 | 0.000 |
| Depression Diagnoses | 26.057 | 0.089 | 0.000 |
| PTSD Diagnoses | 26.194 | 0.089 | 0.000 |
|  | **Sex Effects (DZ twins only)** | | |
| **Trait** | **t/** **χ2 statistic** | **Effect size** | **Adjusted p-value** |
| Autism | -1.642 | 0.076 | 0.505 |
| Bipolar | -0.076 | -0.005 | 1.000 |
| ADHD | -1.642 | 0.076 | 0.505 |
| Eating Behaviors | 0.691 | 0.058 | 1.000 |
| Anxiety | -0.293 | 0.013 | 1.000 |
| Alcohol Use | -0.117 | 0.006 | 1.000 |
| Depression | -0.132 | 0.006 | 1.000 |
| PTSD | -0.673 | 0.031 | 1.000 |
| Autism Diagnoses | 4.209 | 0.046 | 0.505 |
| Bipolar Diagnoses | 0 | 0 | 1.000 |
| ADHD Diagnoses | 0.363 | 0.013 | 1.000 |
| Eating Disorder Diagnoses | 1.901 | 0.032 | 0.630 |
| Anxiety Diagnoses | 0.040 | 0.005 | 1.000 |
| Depression Diagnoses | 0.272 | 0.012 | 1.000 |
| PTSD Diagnoses | 1.146 | 0.024 | 0.852 |
|  | **Birth Order Effects** | | |
| **Trait** | **t/** **χ2 statistic** | **Effect size** | **Adjusted p-value** |
| Autism | -0.804 | 0.029 | 0.900 |
| Bipolar | -0.841 | 0.042 | 0.900 |
| ADHD | 0.080 | -0.003 | 0.937 |
| Eating Behaviors | 1.394 | -0.092 | 0.850 |
| Anxiety | -0.111 | 0.004 | 0.937 |
| Alcohol Use | -0.804 | 0.030 | 0.900 |
| Depression | -0.706 | 0.025 | 0.900 |
| PTSD | -0.080 | 0.003 | 0.937 |
| Autism Diagnoses | 0.112 | 0.006 | 0.937 |
| Bipolar Diagnoses | 1.393 | 0.021 | 0.893 |
| ADHD Diagnoses | 2.192 | 0.026 | 0.850 |
| Eating Disorder Diagnoses | 0.014 | 0.002 | 0.937 |
| Anxiety Diagnoses | 0.078 | 0.005 | 0.937 |
| Depression Diagnoses | 0.291 | 0.009 | 0.937 |
| PTSD Diagnoses | 1.882 | 0.024 | 0.850 |
|  | **Zygosity Effects** | | |
| **Trait** | **t/** **χ2 statistic** | **Effect size** | **Adjusted p-value** |
| Autism | -0.112 | 0.004 | 0.978 |
| Bipolar | -0.45 | -0.023 | 0.890 |
| ADHD | -1.833 | 0.067 | 0.324 |
| Eating Behaviors | 0.699 | 0.047 | 0.728 |
| Anxiety | -1.206 | 0.043 | 0.570 |
| Alcohol Use | -1.721 | 0.065 | 0.324 |
| Depression | -1.074 | 0.038 | 0.606 |
| PTSD | -0.785 | 0.029 | 0.728 |
| Autism Diagnoses | 0.047 | 0.004 | 0.978 |
| Bipolar Diagnoses | 0.59 | 0.013 | 0.728 |
| ADHD Diagnoses | 0.002 | 0.001 | 0.978 |
| Eating Disorder Diagnoses | 0.001 | 0.001 | 0.978 |
| Anxiety Diagnoses | 2.666 | 0.03 | 0.324 |
| Depression Diagnoses | 5.413 | 0.041 | 0.300 |
| PTSD Diagnoses | 2.584 | 0.028 | 0.324 |
|  | **Age Effects** | | |
| **Trait** | **F/z statistic** | **R2** | **Adjusted p-value** |
| Autism | 13.526 | 0.004 | 0.000 |
| Bipolar | 0.005 | 0 | 0.943 |
| ADHD | 5.082 | 0.002 | 0.105 |
| Eating Behaviors | 0.114 | 0 | 0.789 |
| Anxiety | 2.206 | 0.001 | 0.345 |
| Alcohol Use | 0.605 | 0 | 0.546 |
| Depression | 5.727 | 0.002 | 0.105 |
| PTSD | 4.828 | 0.002 | 0.105 |
| Autism Diagnoses | -1.068 | 0.003 | 0.534 |
| Bipolar Diagnoses | 0.888 | 0.003 | 0.546 |
| ADHD Diagnoses | 1.124 | 0.003 | 0.534 |
| Eating Disorder Diagnoses | -0.658 | 0 | 0.588 |
| Anxiety Diagnoses | -0.827 | 0 | 0.546 |
| Depression Diagnoses | -1.712 | 0.001 | 0.261 |
| PTSD Diagnoses | 0.793 | 0.001 | 0.546 |

*Note*. We conducted sensitivity analyses on both dimensioal and diagnostic phenotypes to examine potential group differences. Covariates including sex, birth order, zygosity, and age were tested for potential associations with the outcome variables. When any of these covariates showed significant effects, they were included in the corresponding analyses to account for their influence. For categorical variables—including sex (unrelated female vs. unrelated male; same-sex DZ vs. opposite-sex DZ twins), birth order (firstborn vs. second-born), and zygosity (monozygotic [MZ] vs. dizygotic [DZ])—group differences were assessed using t-tests for dimensioal outcomes and chi-square tests for diagnostic outcomes. Effect sizes were estimated using Cohen’s d for dimensions and Cramér’s V for diagnoses. Analyses of sex effects were conducted both using an unrelated sample and within the DZ twin subsample, while all other group comparisons were performed on an unrelated sample (i.e., one twin randomly selected from each pair). To assess age effects, linear regression was applied for dimensioal outcomes and logistic regression for diagnostic outcomes, with effect sizes reported as the proportion of variance in the outcome explained by age. All p-values were corrected for multiple testing using the false discovery rate (FDR) procedure.

# **Figure S1. Sex-stratified population estimates**


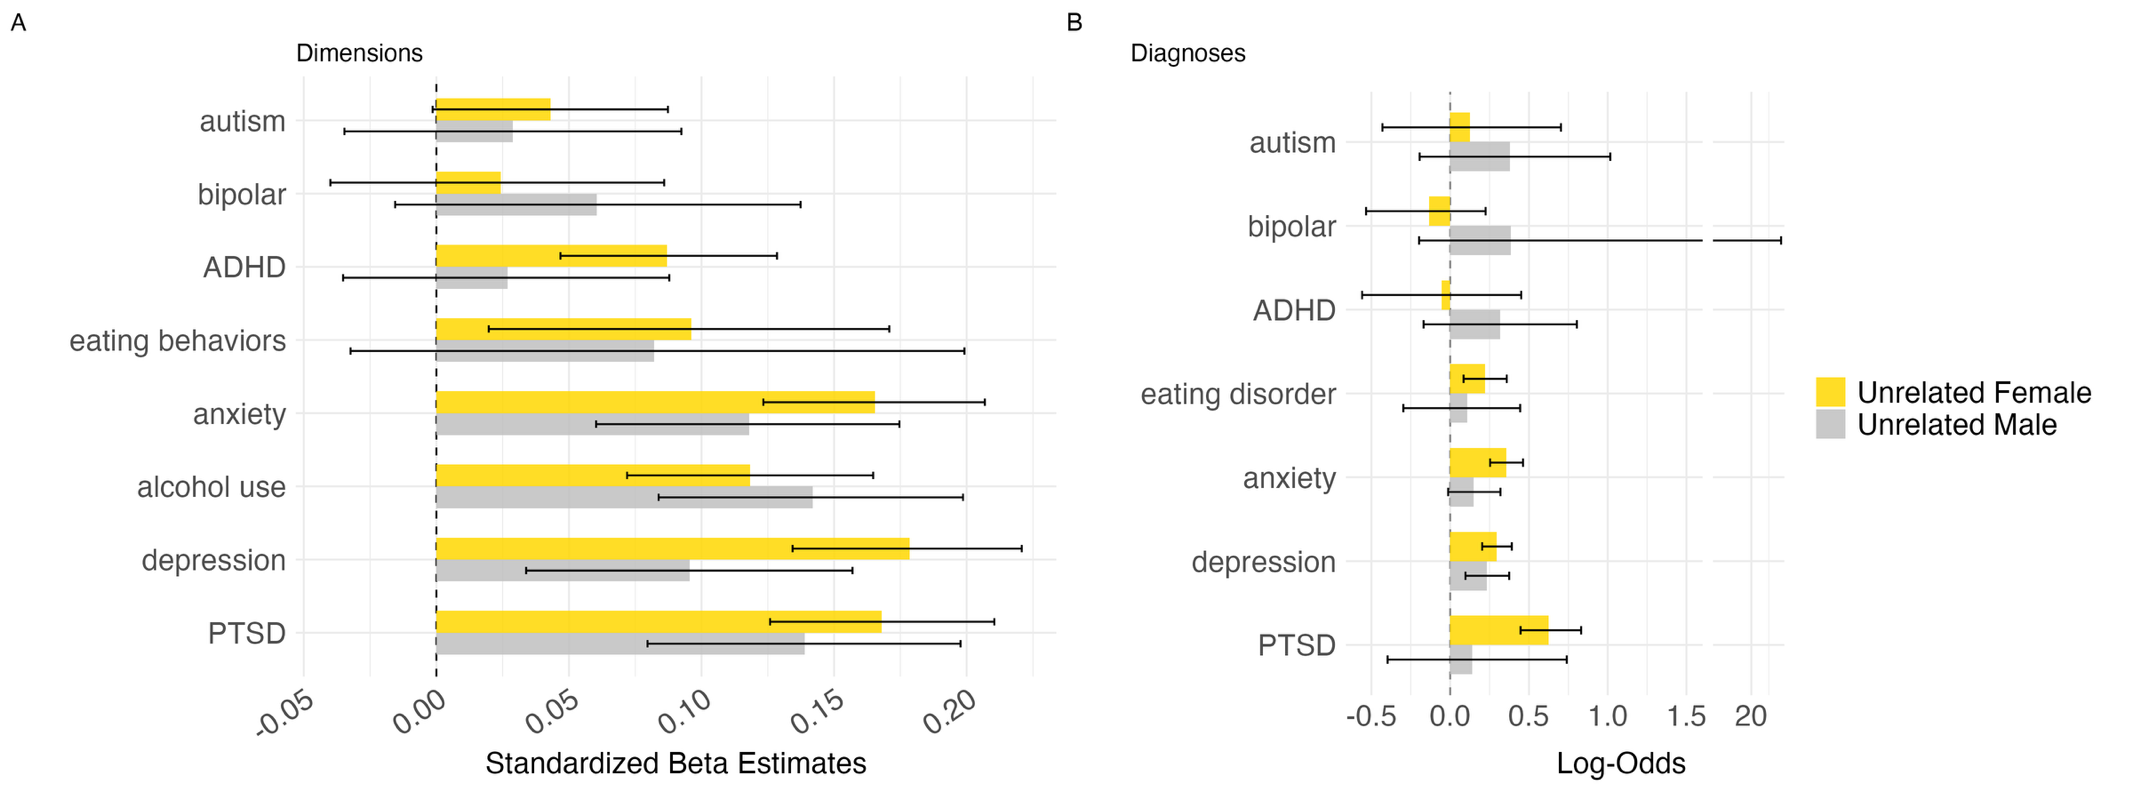


*Note*. Sex-stratified polygenic prediction analysis for psychopathology traits. Despite phenotypic sex differences in some traits, polygenic prediction accuracy did not differ significantly between males and females at the population level. (A) Dimensional traits analyzed using linear regression; estimates shown as standardized beta coefficients. (B) Diagnostic history analyzed using logistic regression; estimates shown as log-odds ratios. Error bars represent 95% confidence intervals derived from 10,000 bootstrap resamples. Asymmetric confidence intervals reflect non-normal bootstrap distributions.

# **Figure S2. Sex-stratified within-family estimates**


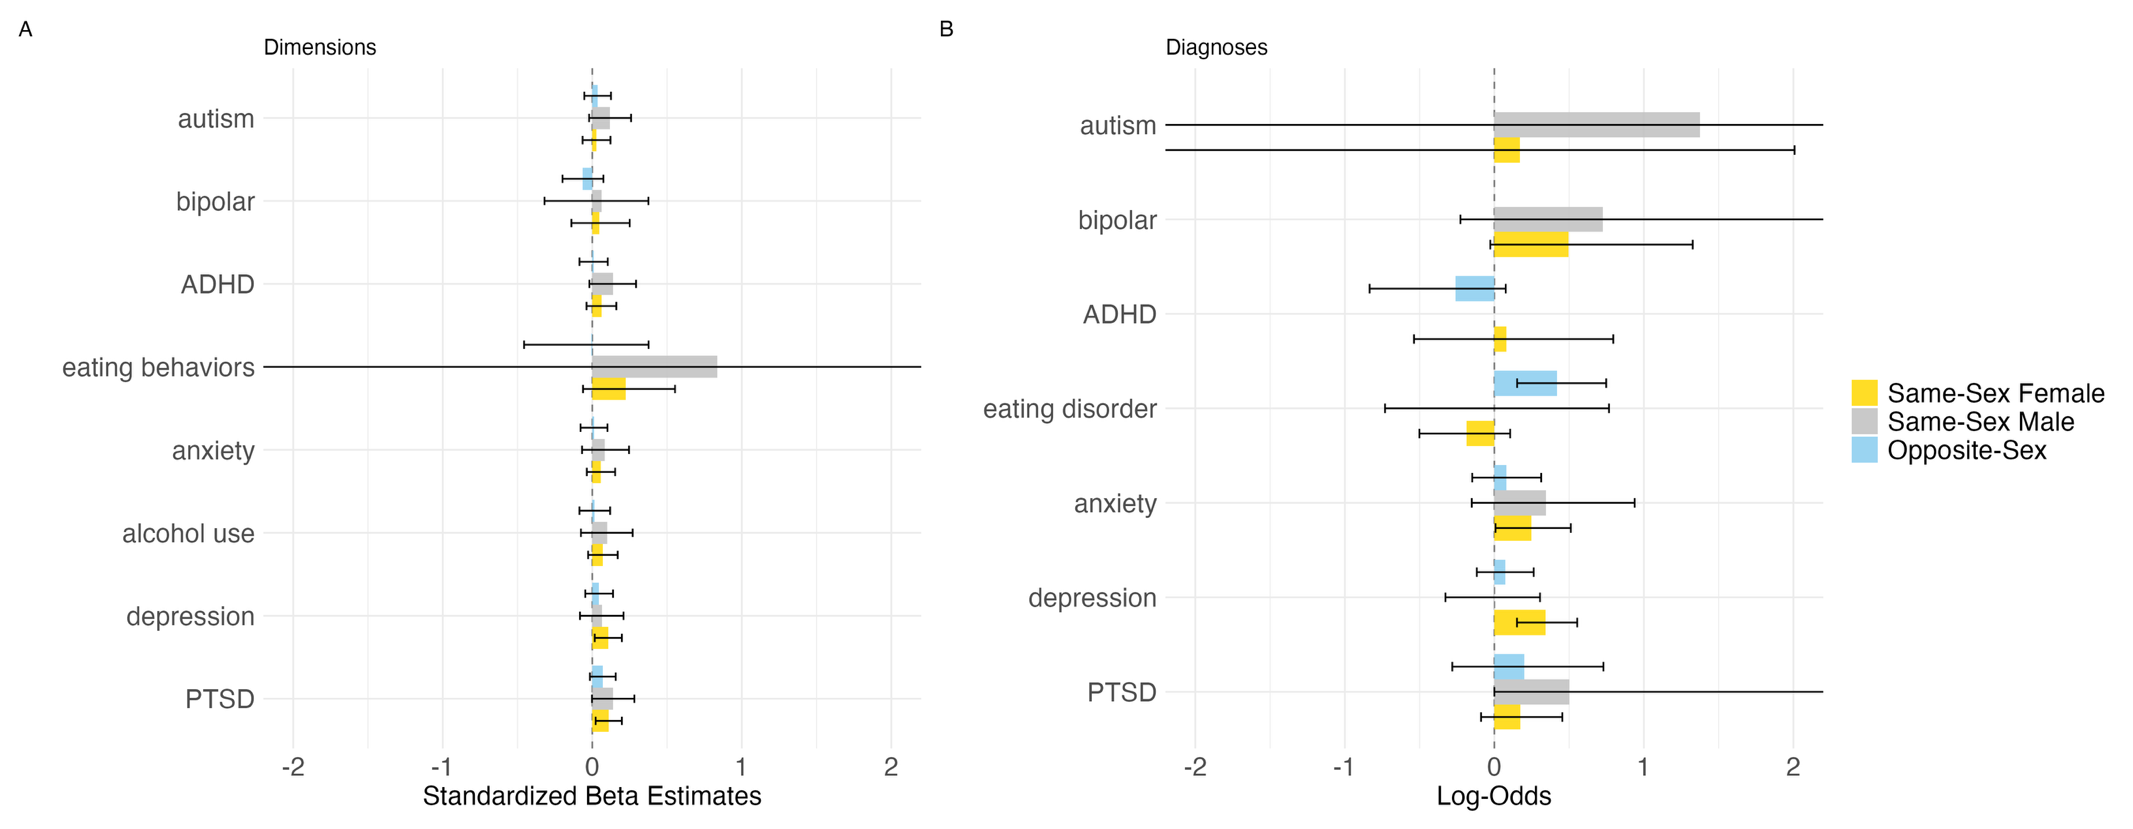


*Note*. Within-family polygenic prediction analysis for psychopathology traits. (A) Dimensions analyzed using linear regression; estimates shown as standardized beta coefficients. (B) Diagnoses analyzed using three-level ordinal logistic regression; estimates shown as log-odds. For visualization, the x-axes are clipped at ±2. Error bars represent 95% confidence intervals derived from 10,000 bootstrap resamples. Extreme estimates and confidence intervals beyond the plotted range can occur in models with low case counts for a specific trait in the sex-stratified sample.

# **References**

1. Dudbridge, F. Power and Predictive Accuracy of Polygenic Risk Scores. *PLoS Genet.* **9**, e1003348 (2013).

2. Muthén, L. K. & Muthén, B. O. How to Use a Monte Carlo Study to Decide on Sample Size and Determine Power. *Struct. Equ. Model. Multidiscip. J.* **9**, 599–620 (2002).
